# Supplementary material for: β-1,3-Glucan polysaccharide can act as a one-dimensional host to create novel silica nanofiber structures
Source: Royal Society of Chemistry journal article supplement (doi:10.1039/b509285j), 2005-01-01
Supplement: b509285j.pdf [file b509285j.pdf]

## Electronic Supplementary Information

### $\beta$ -1,3-Glucan polysaccharide can act as a one-dimensional host to create novel silica nanofiber structures

Munenori Numata<sup>a</sup>, Chun Li<sup>a</sup>, Ah-Hyun Bae<sup>a</sup>, Kenji Kaneko<sup>b</sup>, Kazuo Sakurai<sup>c</sup> and Seiji Shinkai<sup>a\*†</sup>

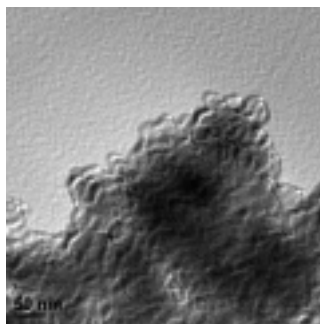

**Fig. S1** TEM image of silica obtained from sol-gel polycondensation reaction of TEOS in the presence of s-SPG.

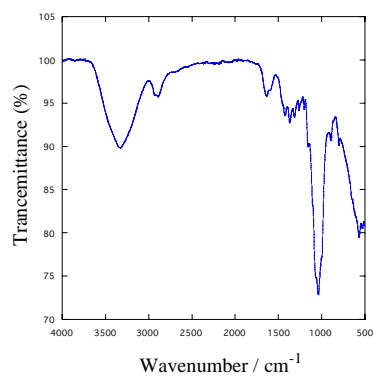

**Fig. S2** ATR-FTIR spectrum of s-SPG/TMPS silica composite, after 20 days sol-gel reaction.

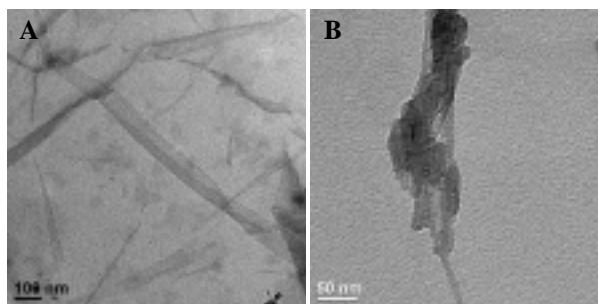

**Fig. S3** TEM image of silica obtained from only TMPS (A) and t-SPG + TMPS mixture (B).
